# Supplementary material for: Synthetic and structural studies on new diiron azadithiolate (ADT)-type model compounds for active site of [FeFe]hydrogenases
Source: Royal Society of Chemistry journal article supplement (doi:10.1039/c0dt00909a), 2010-12-10
Supplement: c0dt00909a.pdf [file c0dt00909a.pdf]

## Supplementary Information

**Title: Synthetic and Structural Studies on New Diiron Azadithiolate (ADT)-Type Model Compounds for Active Site of [FeFe]Hydrogenases**

**Authors: Li-Cheng Song\* , Zhao-Jun Xie, Xu-Feng Liu, Jiang-Bo Ming, Jian-Hua Ge, Xiao-Guan Zhang, Tian-Ying Yan,\* and Peng Gao**

### Contents:

- 1. Fig. S1a** (a) Original  $^{13}\text{C}$  NMR spectrum of **7**. (b) Expanded  $^{13}\text{C}$  NMR spectrum of **7**.
- 2. Fig. S1b** Frontier orbitals of **7** : HOMO(top) and LUMO (bottom).
- 3. Table S1** Comparisons between the experimental and computational IR frequencies and intensities of **6–8**.

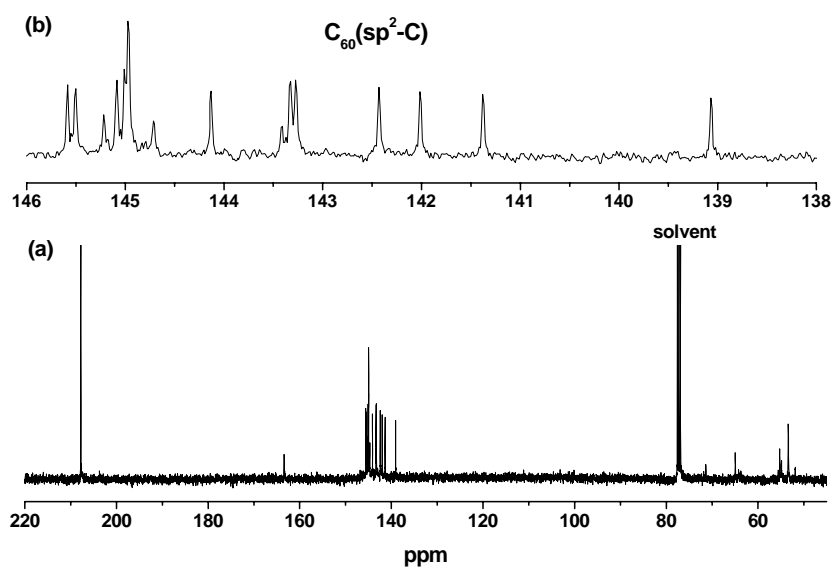

**Fig. S1a** (a) Original  $^{13}C$  NMR spectrum of **7**. (b) Expanded  $^{13}C$  NMR spectrum of **7**.

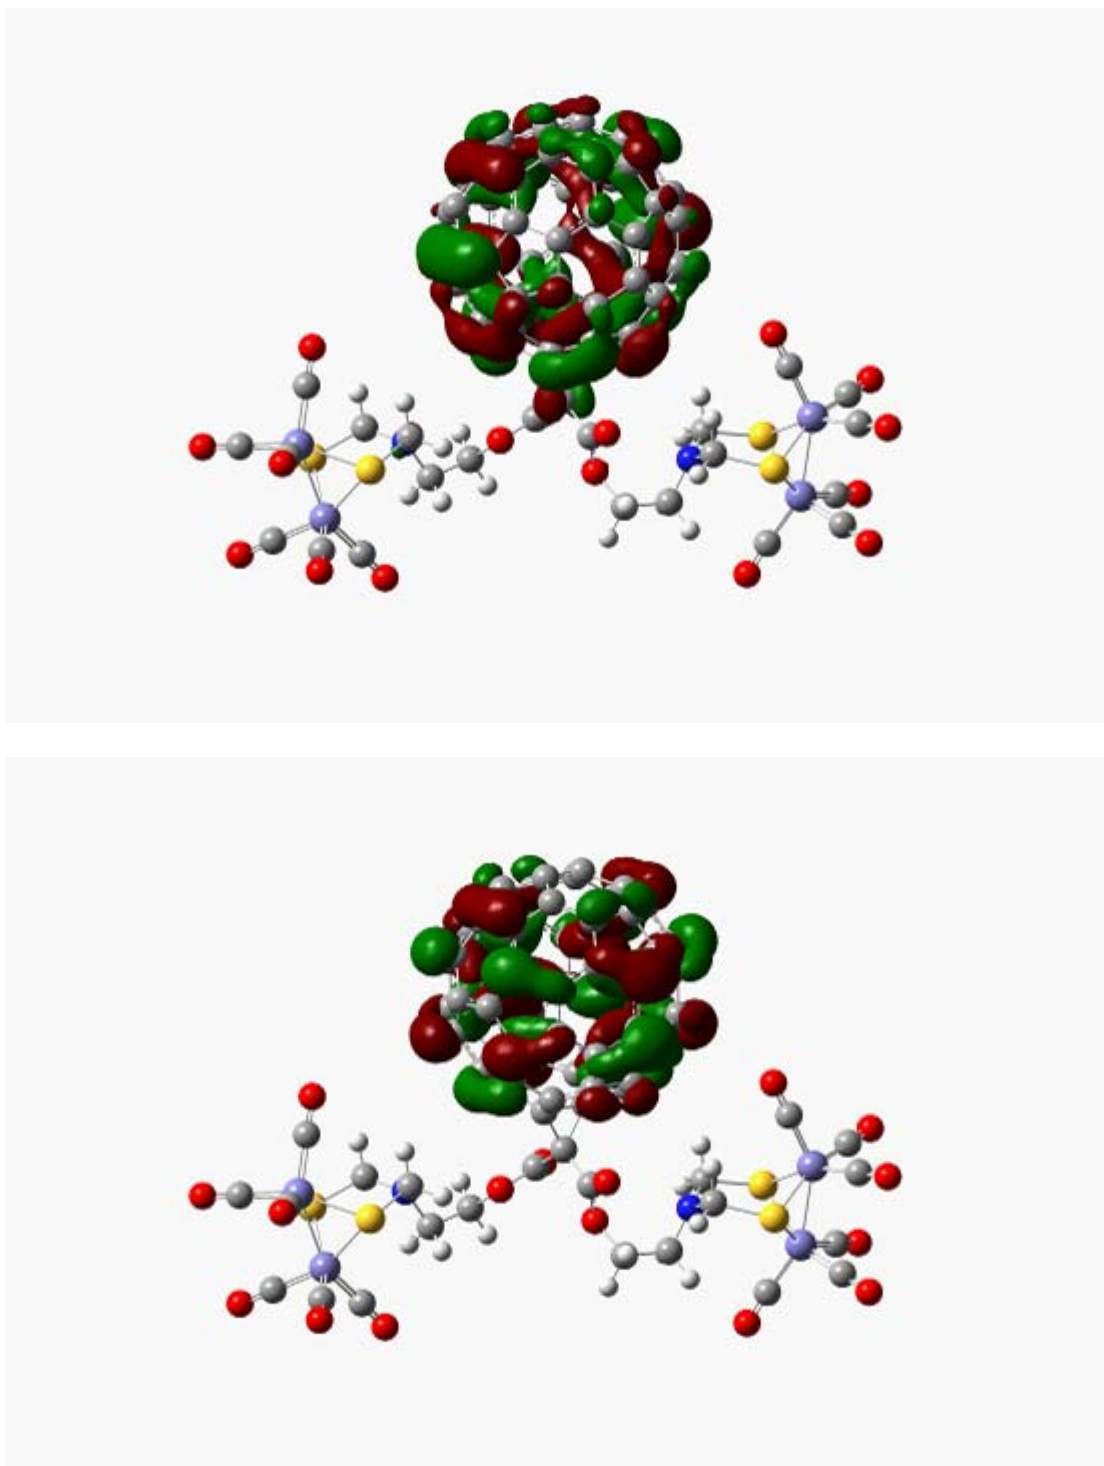

**Fig. S1b** Frontier orbitals of **7** : HOMO(top) and LUMO (bottom).

**Table S1** Comparisons between the experimental and computational IR frequencies and intensities of **6–8**.

|          | vib. mode                      | Experimental              |      | Computational                          |                             |
|----------|--------------------------------|---------------------------|------|----------------------------------------|-----------------------------|
|          |                                | freq. (cm <sup>-1</sup> ) | int. | freq. (cm <sup>-1</sup> ) <sup>a</sup> | int.                        |
| <b>6</b> | $\nu_{\text{C=O}}$             | 1746                      | s    | 1754,1768                              | 168, 26                     |
|          | $\nu_{\text{C}\equiv\text{O}}$ | 1993                      | vs   | 1998,2007, 2007                        | 203, 645, 299               |
|          | $\nu_{\text{C}\equiv\text{O}}$ | 2031                      | vs   | 2024, 2028                             | 1068, 1872                  |
|          | $\nu_{\text{C}\equiv\text{O}}$ | 2071                      | s    | 2074                                   | 760                         |
| <b>7</b> | $\nu_{\text{C=O}}$             | 1748                      | s    | 1756, 1769                             | 138, 107                    |
|          | $\nu_{\text{C}\equiv\text{O}}$ | 1993                      | vs   | 1997,1998,2006,<br>2008, 2008          | 143, 236, 1229, 116,<br>465 |
|          | $\nu_{\text{C}\equiv\text{O}}$ | 2031                      | vs   | 2024,2025,2027,<br>2028                | 806, 1307, 475, 3073        |
|          | $\nu_{\text{C}\equiv\text{O}}$ | 2072                      | s    | 2074, 2075                             | 1272, 304                   |
| <b>8</b> | $\nu_{\text{C=O}}$             | 1746                      | s    | 1754, 1764                             | 152, 55                     |
|          | $\nu_{\text{C}\equiv\text{O}}$ | 1932                      | s    | 1972, 1985                             | 181, 120                    |
|          | $\nu_{\text{C}\equiv\text{O}}$ | 1981                      | vs   | 1997, 2007                             | 1881, 781                   |
|          | $\nu_{\text{C}\equiv\text{O}}$ | 2042                      | vs   | 2049                                   | 1141                        |

<sup>a</sup>The computed frequencies are scaled by 0.9631 as suggested for the B3LYP/6-31G(d) level of theory.<sup>1</sup>

1. J. B. Foresman and A. Frisch, *Exploring Chemistry with Electronic Structure Methods*, Gaussian, Inc., Pittsburgh, PA, 1996.
